# Supplementary material for: Comparing Prescribing and Dispensing Data of the PCORnet Common Data Model Within PCORnet Antibiotics and Childhood Growth Study
Source: PubMed Central journal article supplement (PMC6460498; doi:10.5334/egems.274), 2019-04-12
Supplement: egems-7-1-274-s1.pdf [file egems-7-1-274-s1.pdf]

## **Supplementary Material**

### Appendix 1: Members of the PCORnet Antibiotics and Childhood Growth Study Group

- David Arterburn, MD, Kaiser Permanente Washington Health Research Institute, Seattle, Washington
- Arthur Davidson, MD, MPH, Denver Public Health, Denver, Colorado
- Stephanie L. Fitzpatrick, PhD, Kaiser Permanente Northwest, Portland, Oregon
- Michael Horberg, MD, MAS, Kaiser Permanente Mid-Atlantic Permanente Research Institute, Rockville, Maryland
- Elyse O. Kharbanda, MD, MPH, HealthPartners Institute, Minneapolis, Minnesota
- Pedro Rivera, MS, OCHIN Inc., Portland, Oregon
- Alexander J. Stoddard, MS, Medical College of Wisconsin, Milwaukee, Wisconsin

**Table S1.** Characteristics of antibiotic prescribing and dispensing records from ambulatory visits (N=20,395 patients)

|                                     | <b>Number of Patients, N (%)</b> | <b>Number of Prescribing Records, N (%)</b> | <b>Number of Dispensing Records, N (%)</b> |
|-------------------------------------|----------------------------------|---------------------------------------------|--------------------------------------------|
| <b>Total</b>                        | <b>200,395</b>                   | <b>537,762</b>                              | <b>429,395</b>                             |
| <i>Person-level characteristics</i> |                                  |                                             |                                            |
| Race                                |                                  |                                             |                                            |
| White                               | 124,895 (62.3)                   | 272,642 (63.5)                              | 272,642 (63.5)                             |
| Asian                               | 13,772 (6.9)                     | 27,117 (6.3)                                | 27,117 (6.3)                               |
| Black or African American           | 29,335 (14.6)                    | 66,311 (15.4)                               | 66,311 (15.4)                              |
| Other                               | 8,589 (4.3)                      | 18,772 (4.4)                                | 18,772 (4.4)                               |
| Unknown                             | 23,804 (11.8)                    | 44,553 (10.4)                               | 44,553 (10.4)                              |
| Hispanic                            |                                  |                                             |                                            |
| No                                  | 148,603 (74.2)                   | 343,585 (80.0)                              | 343,585 (80.0)                             |
| Yes                                 | 51,792 (25.8)                    | 85,810 (20.0)                               | 85,810 (20.0)                              |
| Sex                                 |                                  |                                             |                                            |
| Male                                | 102,973 (51.4)                   | 284,721 (53.0)                              | 228,299 (53.2)                             |
| Female                              | 97,422 (48.6)                    | 253,041 (47.1)                              | 201,096 (46.8)                             |
| Institution                         |                                  |                                             |                                            |
| cIDS 1                              | 16,491 (8.2)                     | 43,736 (8.1)                                | 42,650 (9.9)                               |
| cIDS 2                              | 24,950 (12.5)                    | 76,061 (14.1)                               | 71,771 (16.7)                              |
| cIDS 3                              | 19,660 (9.8)                     | 74,604 (13.9)                               | 74,693 (17.4)                              |
| cIDS 4                              | 23,465 (11.7)                    | 76,911 (14.3)                               | 75,571 (17.6)                              |
| Non-cIDS 1                          | 9,712 (4.9)                      | 27,782 (5.2)                                | 20,194 (4.7)                               |
| Non-cIDS 2                          | 22,923 (11.4)                    | 17,091 (3.2)                                | 20,354 (4.7)                               |
| Non-cIDS 3                          | 44,137 (22.0)                    | 157,844 (29.4)                              | 72,090 (16.8)                              |
| Non-cIDS 4                          | 39,057 (19.5)                    | 63,733 (11.9)                               | 52,072 (12.1)                              |
| <i>Record-level characteristics</i> |                                  |                                             |                                            |
| Age category                        |                                  |                                             |                                            |
| 0 - <6 months                       |                                  | 38,324 (7.1)                                | 28,806 (6.7)                               |
| 6 - <12 month                       |                                  | 99,818 (18.6)                               | 75,341 (17.6)                              |
| 12 - <24 months                     |                                  | 155,264 (28.9)                              | 120,540 (28.1)                             |
| 24 - <60 months                     |                                  | 192,206 (35.7)                              | 159,091 (37.1)                             |
| 60 - 132 months                     |                                  | 52,150 (9.7)                                | 45,617 (10.6)                              |
| Encounter type                      |                                  |                                             |                                            |
| Ambulatory visits                   |                                  | 419,084 (77.9)                              | 361,296(84.1)                              |
| Missing same-day encounter          |                                  | 118,678 (22.1)                              | 68,099(15.9)                               |
| Infection Diagnosis                 |                                  |                                             |                                            |
| Tier 1                              |                                  | 34,738 (6.5)                                | 30,623 (7.1)                               |
| Tier 2                              |                                  | 264,572 (49.2)                              | 227,463 (53.0)                             |

|                     |  |                |                |
|---------------------|--|----------------|----------------|
| Tier 3              |  | 46,468 (8.6)   | 38,220 (8.9)   |
| Other               |  | 191,984 (35.7) | 133,089 (31.0) |
| Antibiotic Spectrum |  |                |                |
| Broad               |  | 248,961 (46.3) | 197,844(46.1)  |
| Narrow              |  | 288,801 (53.7) | 231,551(53.9)  |

**Table S2.** Source of dispensing data by institutions

| <b>Institution</b> | <b>Source of dispensing<sup>†</sup></b> | <b>Time of recording for dispensing data</b>                                                                                     | <b>Capture records of medication dispensing from other sources (e.g. Surescript)?</b> |
|--------------------|-----------------------------------------|----------------------------------------------------------------------------------------------------------------------------------|---------------------------------------------------------------------------------------|
| cIDS1              | Pharmacy dispensing                     | When the patient picks up the prescription.                                                                                      | Yes                                                                                   |
| cIDS2              | Pharmacy dispensing                     | When the patient picks up the prescription.                                                                                      | Yes                                                                                   |
| cIDS3              | Pharmacy dispensing                     | When the patient picks up the prescription.                                                                                      | Yes                                                                                   |
| cIDS4              | Pharmacy dispensing                     | When the patient picks up the prescription.                                                                                      | Yes                                                                                   |
| Non-cIDS1          | Pharmacy dispensing                     | When the patient picks up the prescription.                                                                                      | Yes                                                                                   |
| Non-cIDS2          | Pharmacy dispensing                     | When the patient picks up the prescription.                                                                                      | No                                                                                    |
| Non-cIDS3          | Pharmacy claim                          | When the pharmacist fills the prescription, and puts on the shelf. Still recorded if the patient never picks up the prescription | Yes                                                                                   |
| Non-cIDS4          | Pharmacy claim                          | When the patient picks up the prescription.                                                                                      | Yes                                                                                   |

<sup>†</sup>Pharmacy dispensing: Any medication dispensed at institutions' pharmacy regardless of the source of payment and the source of prescription (electronic prescription from your health institution, verbally ordered by prescriber, paper prescription, transferred prescription)

Pharmacy Claim: records of medication dispensed using the patients' pharmacy benefit, does not capture out-of-pocket payment

**Table S3.** List of oral antibiotics included in the study

| Class                    | Medication Names                                                  | RxNorm CUI                                                                                                                                                               | NDC                                                                                                                                                                                                                                                                                                                                                                                                                                                                                                                                                                                                                                                                                                                                                                                                                                                                                                                                                                                                                                                                 |
|--------------------------|-------------------------------------------------------------------|--------------------------------------------------------------------------------------------------------------------------------------------------------------------------|---------------------------------------------------------------------------------------------------------------------------------------------------------------------------------------------------------------------------------------------------------------------------------------------------------------------------------------------------------------------------------------------------------------------------------------------------------------------------------------------------------------------------------------------------------------------------------------------------------------------------------------------------------------------------------------------------------------------------------------------------------------------------------------------------------------------------------------------------------------------------------------------------------------------------------------------------------------------------------------------------------------------------------------------------------------------|
| 1ST GEN<br>CEPHALOSPORIN | CEFADROXIL,<br>CEPHALEXIN                                         | 197452, 309042,<br>309044, 309080,<br>309081, 309096,<br>309097, 309098,<br>313888, 313926,<br>581583, 581584                                                            | 00093314501, 00093314505, 00093314701, 00093314705,<br>00093417573, 00093417574, 00093417773, 00093417774,<br>00143989701, 00143989705, 00143989801, 00143989805,<br>16714038901, 42043014001, 42043014105, 42043014238,<br>42043014258, 42043014338, 42043014358, 63304065601,<br>63304095801, 63304095802, 63304095901, 63304095902,<br>65862001801, 65862001805, 65862001901, 65862001905,<br>65862008301, 67877021901, 67877021905, 67877022001,<br>68180012101, 68180012102, 68180012201, 68180012202,<br>68180012301, 68180012302, 68180012401, 68180012402,<br>68180018102, 68180018203, 76439010110, 76439010150,<br>76439010250                                                                                                                                                                                                                                                                                                                                                                                                                            |
| 2ND GEN<br>CEPHALOSPORIN | CEFACLOR, CEFPROZIL,<br>CEFUROXIME                                | 197452, 309042,<br>309044, 309080,<br>309081, 309096,<br>309097, 309098,<br>313888, 313926,<br>581583, 581584                                                            | 00093107573, 00093107673, 00093107678, 00173074000,<br>00173074100, 00173074110, 00781620246, 00781620257,<br>00781620346, 00781620357, 00781620391, 16571007012,<br>16571007112, 16714021502, 16714021503, 16714021601,<br>16714021602, 16714021603, 16714038603, 16714038701,<br>16714038702, 16714038703, 16714039603, 16714039701,<br>16714039702, 16714039703, 42043026338, 42043026357,<br>42043026377, 57237003501, 63304095602, 63304096304,<br>63304096403, 63304096404, 65862009901, 65862010001,<br>65862010075, 65862069960, 67877021660, 68180030220,<br>68180030320, 68180040101, 68180040102, 68180040103,<br>68180040201, 68180040202, 68180040203, 68180040301,<br>68820001815, 68820001816, 68820001817, 68820001915,<br>68820001916, 68820001917                                                                                                                                                                                                                                                                                                 |
| 3RD GEN<br>CEPHALOSPORIN | CEFDINIR, CEFIXIME,<br>CEFPODOXIME,<br>CEFTIBUTEN,<br>CEFTRIAXONE | 1043022, 1043025,<br>1043030, 1373014,<br>197451, 200346, 2193,<br>309054, 309058,<br>309077, 309078,<br>309079, 309085,<br>409823, 419849,<br>476576, 581574,<br>705008 | 00074377160, 00093413664, 00093413673, 00093413764,<br>00093413773, 00781217660, 00781543920, 00781607746,<br>00781607761, 00781607846, 00781607861, 00781616846,<br>00781616852, 00781616946, 00781616952, 16714020601,<br>16714020602, 16714020701, 16714020702, 16714039102,<br>16714039201, 16714039202, 16714039301, 16714039302,<br>16714040301, 16714040302, 27437020108, 27437020311,<br>27437020602, 27437020603, 27437020811, 42043025167,<br>42043025238, 42043025267, 57237009960, 63304096503,<br>63304096504, 63304096603, 63304096604, 65862009620,<br>65862014001, 65862014050, 65862014101, 65862014150,<br>65862017760, 65862021801, 65862021860, 65862021901,<br>65862021960, 65862075150, 65862075250, 65862075275,<br>67253000841, 67253000846, 67253000941, 67253001106,<br>67253001241, 67253001242, 67253001341, 67253001342,<br>68001015006, 68180020201, 68180020203, 68180040501,<br>68180040703, 68180040704, 68180071160, 68180072210,<br>68180072220, 68180072310, 68180072320, 68820006417,<br>68820006437, 68820006517, 68820006537 |
| FLUOROQUINOLONE          | CIPROFLOXACIN,<br>LEVOFLOXACIN,<br>MOXIFLOXACIN                   | 197511, 197512,<br>199370, 199884,<br>199885, 211816,<br>309308, 309309,<br>309310, 311296,<br>311787, 477391,<br>544445                                                 | 00045151501, 00045152050, 00085173301, 00085177301,<br>00085177701, 00143992701, 00172531160, 00172531260,<br>00172531360, 10147094106, 13668008250, 16252051401,<br>16252051501, 16252051605, 16571041110, 33342002108,<br>50383028604, 50383028608, 50383028616, 50419077301,<br>50419077701, 50458017001, 50458092550, 55111012506,<br>55111012601, 55111012701, 55111027950, 61442022201,<br>68180024001, 68180024108, 68180039201, 68180039301,<br>68382001701                                                                                                                                                                                                                                                                                                                                                                                                                                                                                                                                                                                                 |
| GLYCOPEPTIDE             | VANCOMYCIN                                                        | 239210, 313570,<br>313571                                                                                                                                                | 17478074102, 17478074202, 66593312502                                                                                                                                                                                                                                                                                                                                                                                                                                                                                                                                                                                                                                                                                                                                                                                                                                                                                                                                                                                                                               |

|                |                                                    |                                                                                                                                                                                |                                                                                                                                                                                                                                                                                                                                                                                                                                                                                                                                                                                                                                                                                                                                                                                                                                                                                                                                                                                                                                                                                                                                     |
|----------------|----------------------------------------------------|--------------------------------------------------------------------------------------------------------------------------------------------------------------------------------|-------------------------------------------------------------------------------------------------------------------------------------------------------------------------------------------------------------------------------------------------------------------------------------------------------------------------------------------------------------------------------------------------------------------------------------------------------------------------------------------------------------------------------------------------------------------------------------------------------------------------------------------------------------------------------------------------------------------------------------------------------------------------------------------------------------------------------------------------------------------------------------------------------------------------------------------------------------------------------------------------------------------------------------------------------------------------------------------------------------------------------------|
| LINCOSAMIDE    | CLINDAMYCIN                                        | 197518, 284215, 309329, 562266, 748743                                                                                                                                         | 00009033102, 00009076004, 00093317101, 00527138104, 00527138201, 00574012901, 00591293201, 00591312001, 00591570801, 00781211201, 59762001601, 59762332801, 59762501002, 63304069201, 63304069205, 63304069301, 64980051110, 65162046819, 65862018501, 65862059601                                                                                                                                                                                                                                                                                                                                                                                                                                                                                                                                                                                                                                                                                                                                                                                                                                                                  |
| MACRO/SULFA    | ERYTHROSULF                                        | 895384                                                                                                                                                                         | 00074715613, 00074803053, 00555044521, 00555044523, 00904247504, 00904247507, 00904247508, 51285044521, 51285044522, 51285044523                                                                                                                                                                                                                                                                                                                                                                                                                                                                                                                                                                                                                                                                                                                                                                                                                                                                                                                                                                                                    |
| MACROLIDE      | AZITHROMYCIN, CLARITHROMYCIN, ERYTHROMYCIN         | 105260, 141963, 197516, 197517, 204844, 205860, 211307, 212446, 240741, 248656, 308459, 308460, 309322, 598006, 686383, 686400, 686402, 686405, 686418, 686420, 749783, 863603 | 00054003721, 00069306030, 00069311019, 00069312019, 00069313019, 00069314019, 00074318813, 00074374716, 00074374816, 00074630213, 00074630513, 00074630616, 00074636902, 00074636910, 00074637316, 00093202623, 00093202631, 00093202694, 00093202723, 00093714609, 00093714618, 00093714656, 00093714756, 00093714823, 00093714923, 00093714931, 00093714994, 00093715706, 00093715806, 00093716933, 00093716956, 00185720370, 00185721268, 00781149631, 00781149668, 00781602246, 00781602252, 00781602346, 00781602352, 24338010213, 24338012213, 24338013013, 24338013213, 24338013402, 24338013610, 50111076728, 50111078751, 50111078766, 50111079120, 50111079222, 50111079320, 59762306001, 59762306002, 59762306003, 59762311001, 59762312001, 59762313001, 59762314001, 60505258100, 60505258103, 63304082104, 63304082204, 64679096101, 64679096105, 65862022560, 68382076405, 68382076406, 68382076505, 68382076506, 68387056506, 68774030229, 68774030235, 68774030329, 68774030335                                                                                                                                    |
| NITROFURANS    | NITROFURANTOIN                                     | 1648755, 207790, 207791, 311989, 311994, 311995, 539712, 7454                                                                                                                  | 00093213001, 00093213010, 00149000705, 00185012201, 00378165001, 00378165005, 00591368401, 43386045011, 47781030301, 47781030601, 47781030701, 47781030801, 52427028501, 52427028601, 57664023932, 59630045008, 59630045016, 65162068988, 66993047173                                                                                                                                                                                                                                                                                                                                                                                                                                                                                                                                                                                                                                                                                                                                                                                                                                                                               |
| OTHER          | METRONIDAZOLE, TRIMETHOPRIM                        | 199055, 311681, 314106, 562707, 6922                                                                                                                                           | 00093085105, 00591252101, 00591252125, 00591252205, 00591252250, 00591396901, 00591396905, 00591396925, 00591397005, 00591521505, 38779014608, 38779023801, 38779023804, 38779023805, 38779023809, 49452472703, 50111033301, 50111033302, 50111033306, 50111033401, 50111033402, 51552003805, 51552046502, 51552046504, 51552046505, 51552046506, 51927155900, 53489013601                                                                                                                                                                                                                                                                                                                                                                                                                                                                                                                                                                                                                                                                                                                                                          |
| OXAZOLIDINONES | LINEZOLID                                          | 311345                                                                                                                                                                         | 00009513601, 00054031950                                                                                                                                                                                                                                                                                                                                                                                                                                                                                                                                                                                                                                                                                                                                                                                                                                                                                                                                                                                                                                                                                                            |
| PENICILLIN     | AMOXICILLIN, AMPICILLIN, DICLOXACILLIN, PENICILLIN | 197595, 197596, 239191, 308177, 308181, 308182, 308188, 308189, 308191, 308192, 308194, 308210, 313797, 313799, 313800, 313850, 313945, 598025, 834040, 834046, 834061, 834102 | 00003173745, 00003173830, 00003173840, 00003173845, 00029600822, 00029600922, 00029600923, 00029604954, 00029604955, 00029604959, 00093117201, 00093117210, 00093117401, 00093117410, 00093226301, 00093226401, 00093226701, 00093226801, 00093226805, 00093310701, 00093310705, 00093310905, 00093312301, 00093412573, 00093412574, 00093412773, 00093412774, 00093415073, 00093415079, 00093415080, 00093415573, 00093415579, 00093415580, 00093416073, 00093416076, 00093416078, 00093416173, 00093416176, 00093416178, 00093519874, 00093519974, 00143988601, 00143988650, 00143988675, 00143988701, 00143988750, 00143988775, 00143988801, 00143988815, 00143988880, 00143988901, 00143988915, 00143988980, 00143993801, 00143993805, 00143993901, 00143993905, 00143995101, 00143995120, 00172741821, 00172741823, 00172742021, 00172742022, 00781120501, 00781202001, 00781202005, 00781225801, 00781261301, 00781261305, 00781261331, 00781506101, 00781506120, 00781603946, 00781603955, 00781603958, 00781604146, 00781604155, 00781604158, 00781612146, 00781615646, 00781615652, 00781615657, 00781615746, 00781615752, |

|                        |                                                |                                                                                                        |                                                                                                                                                                                                                                                                                                                                                                                                                                                                                                                                                                                                                                                                                                                                                                                                                                                                                                                                                                                                                                                                                                                                                                                                                                                                                                                                                                                                                                                    |
|------------------------|------------------------------------------------|--------------------------------------------------------------------------------------------------------|----------------------------------------------------------------------------------------------------------------------------------------------------------------------------------------------------------------------------------------------------------------------------------------------------------------------------------------------------------------------------------------------------------------------------------------------------------------------------------------------------------------------------------------------------------------------------------------------------------------------------------------------------------------------------------------------------------------------------------------------------------------------------------------------------------------------------------------------------------------------------------------------------------------------------------------------------------------------------------------------------------------------------------------------------------------------------------------------------------------------------------------------------------------------------------------------------------------------------------------------------------------------------------------------------------------------------------------------------------------------------------------------------------------------------------------------------|
|                        |                                                |                                                                                                        | 00781615757, 16714023401, 16714023501, 16714029801, 16714029802, 16714029904, 43598020750, 43598020751, 43598020752, 43598020952, 43598020953, 43598021901, 43598022350, 43598022351, 43598022352, 49884007247, 49884007269, 49884007327, 49884007328, 49884007347, 54868412902, 55370088714, 57237002801, 57237002901, 57237003001, 57237003005, 57237003101, 57237003105, 57237003201, 57237003301, 57237003350, 57237003375, 57237004001, 57237004101, 57237004105, 57237004199, 59762102003, 59762102202, 59762102204, 59762102207, 59762102304, 59762102305, 59762102306, 59762105002, 59762153401, 63304051501, 63304065501, 63304076020, 63304076101, 63304076120, 63304096901, 63304096903, 63304096904, 63304097001, 63304097003, 63304097004, 65862001501, 65862001601, 65862001705, 65862007101, 65862007150, 65862007175, 65862017501, 65862017601, 67253014150, 67253014215, 67253014308, 67253014310, 67253014315, 67253014646, 67253014647, 67253014845, 67253014846, 67253014847, 67253014943, 67253014944, 67253015050, 67253018010, 67253018310, 67253018320, 67253020010, 67253020011, 67253020110, 67253020111, 67253020150, 67253020210, 67253020220, 67253020310, 67253020320, 68387043040                                                                                                                                                                                                                                   |
| PENICILLIN COMBINATION | AMOXCLAV                                       | 562251, 562508, 617296, 617302, 617304, 617309, 617316, 617322, 617333, 617339, 617423, 617430, 617993 | 00029608522, 00029608523, 00029608539, 00029608739, 00029609022, 00029609023, 00029609039, 00029609229, 00029609440, 00093227034, 00093227234, 00093227434, 00093227534, 00093227773, 00093227973, 00093867574, 00093867575, 00093867578, 00143985316, 00143985324, 00143985375, 00143998101, 00143998150, 00143998175, 00143998201, 00143998250, 00143998275, 00172740620, 00172740722, 00172740822, 00781161966, 00781164366, 00781185220, 00781187431, 007811610246, 007811610446, 007811613948, 007811613954, 007811613957, 16714029201, 16714029202, 16714029203, 16714029301, 16714029302, 16714029303, 16714029401, 16714029402, 16714029403, 16714029501, 16714029601, 16714029701, 43598000451, 43598000452, 43598001251, 43598001252, 43598001253, 43598020351, 43598020354, 43598020369, 43598020451, 43598020452, 43598020453, 43598020614, 43598020850, 43598020851, 43598020852, 43598021350, 43598021351, 43598021352, 43598021830, 43598022114, 49884016827, 49884016828, 49884020128, 49884020149, 49884020170, 49884029907, 54569433700, 60432006500, 60432006547, 60432006575, 60432007046, 60432007048, 60432007075, 63304076801, 63304076807, 63304097701, 63304097703, 63304097704, 63304097901, 63304097903, 63304097904, 65862050220, 65862050320, 65862053301, 65862053401, 65862053513, 65862053575, 66685100100, 66685100101, 66685100200, 66685101100, 66685101101, 66685101102, 66685101200, 66685101201, 66685101202 |
| SULFA                  | SULFAMETH/TRIMETH, SULFISOXAZOLE, TRIMETHOPRIM | 198332, 198334, 198335, 198420, 208406, 261353, 313134                                                 | 00004100328, 00093547616, 00179013806, 00179013820, 00472128516, 00472128533, 00591557101, 00603168458, 00603168558, 00603578021, 00603578128, 13310014501, 13551050105, 50383082316, 50383082416, 53489014501, 53489014505, 53489014601, 53489014605, 53746027101, 53746027105, 53746027201, 53746027205, 54879000716, 61971011501, 61971012005, 65862041901, 65862042005, 65862049647                                                                                                                                                                                                                                                                                                                                                                                                                                                                                                                                                                                                                                                                                                                                                                                                                                                                                                                                                                                                                                                            |
| TETRACYCLINE           | DOXYCYCLINE, MINOCYCLINE, TETRACYCLINE         | 1649988, 1650030, 1650142, 1650143, 197984, 197985, 198252, 283535,                                    | 00069097065, 00069097193, 00143314150, 00143314205, 00172240760, 00172298570, 00378602101, 00378602389, 00527133601, 00527133850, 00591555350, 10337081403, 49884009304, 49884072601, 53489011802, 53489011905,                                                                                                                                                                                                                                                                                                                                                                                                                                                                                                                                                                                                                                                                                                                                                                                                                                                                                                                                                                                                                                                                                                                                                                                                                                    |

|  |  |                |                                                    |
|--|--|----------------|----------------------------------------------------|
|  |  | 310026, 702296 | 53489055001, 63304069401, 65862021150, 68180065208 |
|--|--|----------------|----------------------------------------------------|
